# Supplementary material
Source: publisher site journal article supplement (https://www.dovepress.com/article/367272)
Supplement: Supplementary file 1 [file get_supplementary_file.php]

**Supplement**

**Tables**

**Tab. S1: Patient characteristics**

|  | **Vespid stings (n = 170)** | **Bee stings (n = 25)** |
| --- | --- | --- |
| **Sex** |  |  |
| Male All ages | 87 (51.2%) | 10 (40.0%) |
| < 18 years old | 9 (5.3%) | 3 (12.0%) |
| Female All ages | 83 (48.8%) | 15 (60.0%) |
| < 18 years old | 2 (1.2%) | 6 (24.0%) |
| **Age (years)** |  |  |
| Median | 46.4 | 36.9 |
| Average | 46.0 | 31.5 |
| Maximum | 74.6 | 61.6 |
| Minimum | 10.1 | 5.6 |

**Tab. S2: Concomitant diseases and comorbidities**

|  | **Vespid stings (n = 170)** | **Bee stings (n = 25)** |
| --- | --- | --- |
| Chronic obstructive pulmonary disease (COPD) and/or bronchial asthma | 17 (10.0%) | 1 (4.0%) |
| Cardiovascular diseases (without arterial hypertension) | 13 (7.6%) | 2 (8.0%) |
| Arterial hypertension | 36 (21.2%) | 1 (4.0%) |
| Psychiatric diseases | 3 (1.8%) | 1 (4.0%) |
| Atopic dermatitis | 4 (2.4%) | 2 (8.0%) |
| Allergic rhinitis | 36 (21.2%) | 5 (20.0%) |
| Rheumatic diseases | 1 (0.6%) | 0 (0.0%) |
| Mastocytosis* | 12 (7.1%) | 0 (0.0%) |
| Active malignancies | 1 (0.6%)** | 0 (0.0%) |
| * No differentiation between cutaneous and systemic mastocytosis.  ** Malignant melanoma | | |

**Tab. S3: Medications prescribed**

|  | **Vespid stings**  **(n = 170)** | **Bee stings**  **(n = 25)** |
| --- | --- | --- |
| **Antihistamines** |  |  |
| H1-blockers | 7 (4.1%) | 1 (4.0%) |
| **Antihypertensives** |  |  |
| Beta-blockers | 6 (3.5%) | 0 (0.0%) |
| Angiotensin-converting enzyme (ACE)-inhibitors | 12 (7.1%) | 0 (0.0%) |
| Other anti-hypertensive medications | 21 (12.4%) | 0 (0.0%) |
| **Glucocorticoids** |  |  |
| Inhaled glucocorticoids | 8 (4.7%) | 1 (4.0%) |
| Prednisolone equivalents | 0 (0.0%) | 0 (0.0%) |
| **Psychotropic drugs** | 3 (1.7%) | 1 (4.0%) |

**Figures**

**
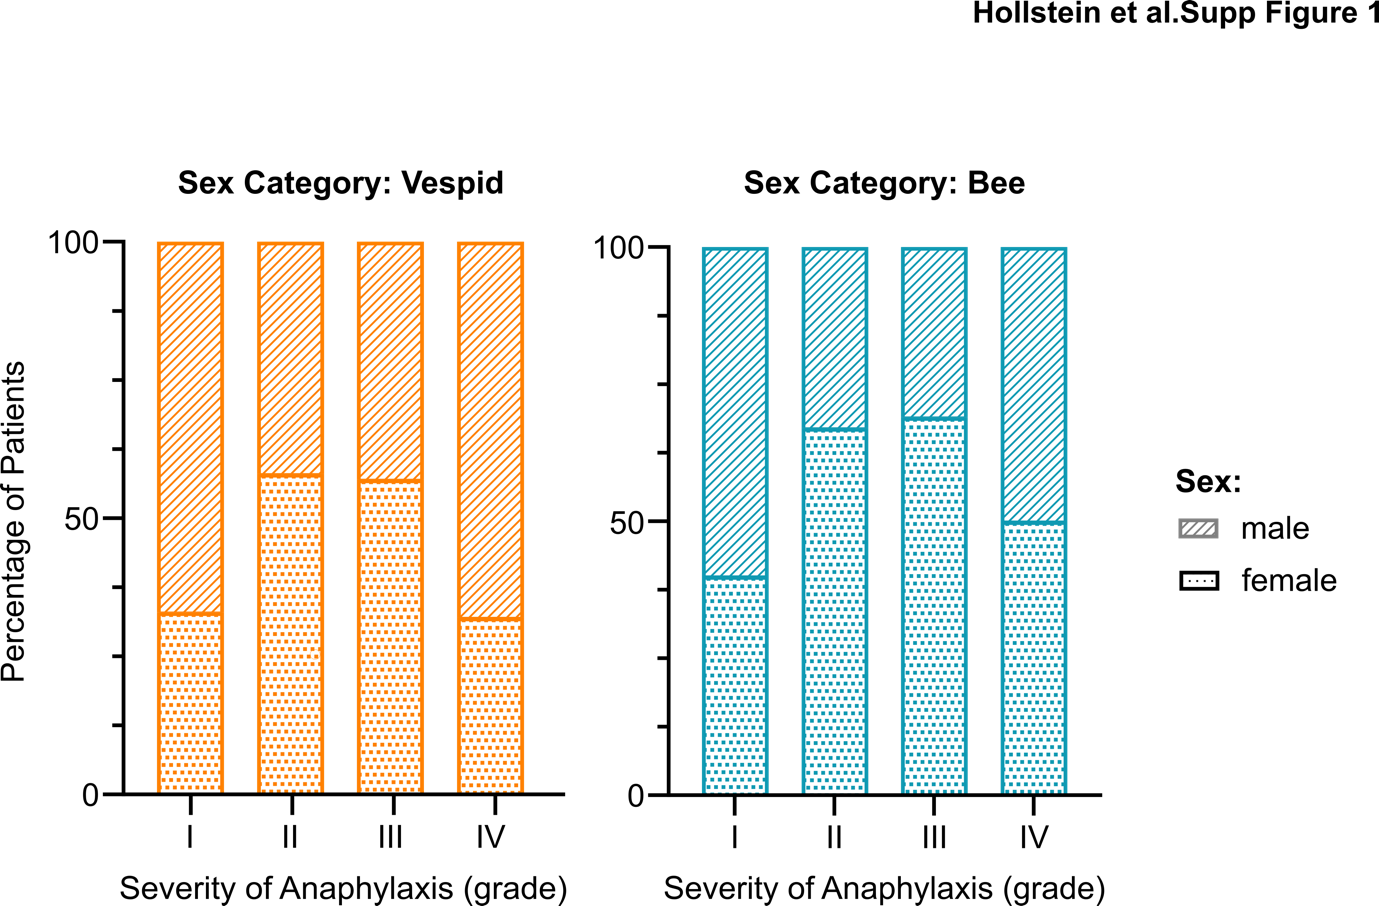
**

**Fig. S1: The severity of anaphylaxis in males *versus* females.** Values on the x-axis are severities of anaphylaxis graded I – IV according to Mueller1. The percentages of male and female patients are as indicated on the y-axis. Results are shown for both vespid (left, n=169) and bee (right, n=25) venom allergies.

**References**

1. Mueller HL. Diagnosis and Treatment of Insect Sensitivity. J Asthma Res. 1966;3(4):331-333.
